# Supplementary material for: Alternative Evolutionary Pathways in Paspalum Involving Allotetraploidy, Sexuality, and Varied Mating Systems
Source: MDPI journal article supplement (doi:10.3390/genes14061137), 2023-05-24
Supplement: s1 [file s1]

**Table S1.** Number and percentage of ovules observed bearing different embryo sacs types in individual plants of five populations of four *Paspalum* species.

| Species              | Population | Plant | Ovules<br>(no.) | Number (%) of ovules with |     |           |          |
|----------------------|------------|-------|-----------------|---------------------------|-----|-----------|----------|
|                      |            |       |                 | MES                       | AES | MES + AES | AbES     |
| <i>P. durifolium</i> | PD1        | 1     | 30              | 27(90.0)                  | -   | -         | 3(10.0)  |
|                      |            | 2     | 30              | 22(73.3)                  | -   | -         | 8(26.7)  |
|                      |            | 3     | 31              | 28(90.3)                  | -   | 1(3.2)    | 2(6.5)   |
|                      |            | 4     | 30              | 21(70.0)                  | -   | -         | 9(30.0)  |
|                      |            | 5     | 31              | 29(93.5)                  | -   | -         | 2(6.5)   |
|                      | PD2        | 1     | 30              | 28(93.3)                  | -   | -         | 2(6.7)   |
|                      |            | 2     | 30              | 27(90.0)                  | -   | -         | 3(10.0)  |
|                      |            | 3     | 30              | 29(96.7)                  | -   | -         | 1(3.3)   |
|                      |            | 4     | 30              | 29(96.7)                  | -   | -         | 1(3.3)   |
|                      |            | 5     | 30              | 28(93.3)                  | -   | -         | 2(6.7)   |
|                      | PD3        | 1     | 30              | 28(93.3)                  | -   | -         | 2(6.7)   |
|                      |            | 2     | 30              | 29(96.7)                  | -   | -         | 1(3.3)   |
|                      |            | 3     | 31              | 25(80.6)                  | -   | 6(19.4)   | -        |
|                      |            | 4     | 30              | 24(80.0)                  | -   | -         | 6(20.0)  |
|                      |            | 5     | 30              | 28(93.3)                  | -   | -         | 2(6.7)   |
|                      | PD4        | 1     | 30              | 24(80.0)                  | -   | 6(20.0)   | -        |
|                      |            | 2     | 30              | 15(50.0)                  | -   | 4(13.3)   | 11(36.7) |
|                      |            | 3     | 33              | 30(90.9)                  | -   | -         | 3(9.1)   |
|                      |            | 4     | 30              | 30(100)                   | -   | -         | -        |
|                      |            | 5     | 30              | 30(100)                   | -   | -         | -        |
|                      | PD5        | 1     | 30              | 18(60.0)                  | -   | 3(10.0)   | 9(30.0)  |
|                      |            | 2     | 34              | 30(88.2)                  | -   | 1(2.9)    | 3(8.8)   |
|                      |            | 3     | 30              | 21(70.0)                  | -   | -         | 9(30.0)  |
|                      |            | 4     | 30              | 24(80.0)                  | -   | -         | 6(20.0)  |
|                      |            | 5     | 32              | 31(96.9)                  | -   | 1(3.1)    | -        |
| <i>P. ionanthum</i>  | PI1        | 1     | 31              | 28(90.3)                  | -   | -         | 3(9.7)   |
|                      |            | 2     | 30              | 26(86.7)                  | -   | 3(10.0)   | 1(3.3)   |
|                      |            | 3     | 34              | 33(97.19)                 | -   | 1(2.9)    | -        |
|                      |            | 4     | 30              | 30(100)                   | -   | -         | -        |
|                      |            | 5     | 33              | 33(100)                   | -   | -         | -        |
|                      | PI2        | 1     | 30              | 27(90.0)                  | -   | 2(6.7)    | 1(3.3)   |
|                      |            | 2     | 30              | 30(100)                   | -   | -         | -        |
|                      |            | 3     | 31              | 30(96.8)                  | -   | -         | 1(3.2)   |
|                      |            | 4     | 30              | 30(100)                   | -   | -         | -        |
|                      |            | 5     | 30              | 30(100)                   | -   | -         | -        |
|                      | PI3        | 1     | 30              | 29(96.7)                  | -   | -         | 1(3.3)   |
|                      |            | 2     | 30              | 30(100)                   | -   | -         | -        |
|                      |            | 3     | 30              | 30(100)                   | -   | -         | -        |
|                      |            | 4     | 30              | 30(100)                   | -   | -         | -        |
|                      |            | 5     | 30              | 30(100)                   | -   | -         | -        |
|                      | PI4        | 1     | 31              | 30(96.8)                  | -   | -         | 1(3.2)   |
|                      |            | 2     | 37              | 36(97.3)                  | -   | -         | 1(2.7)   |
|                      |            | 3     | 30              | 29(96.7)                  | -   | -         | 1(3.3)   |
|                      |            | 4     | 35              | 34(97.1)                  | -   | -         | 1(2.9)   |

|                     |     |   |    |          |   |   |          |
|---------------------|-----|---|----|----------|---|---|----------|
| <i>P. regnellii</i> | PI5 | 5 | 32 | 31(96.9) | - | - | 1(3.1)   |
|                     |     | 1 | 36 | 35(97.2) | - | - | 1(2.8)   |
|                     |     | 2 | 30 | 30(100)  | - | - | -        |
|                     |     | 3 | 32 | 31(96.9) | - | - | 1(3.1)   |
|                     |     | 4 | 30 | 30(100)  | - | - | -        |
|                     | PR1 | 5 | 30 | 30(100)  | - | - | -        |
|                     |     | 1 | 30 | 20(66.7) | - | - | 10(33.3) |
|                     |     | 2 | 31 | 23(74.2) | - | - | 8(25.8)  |
|                     |     | 3 | 30 | 27(90.0) | - | - | 3(10.0)  |
|                     |     | 4 | 39 | 18(46.2) | - | - | 21(53.8) |
|                     | PR2 | 5 | 30 | 24(80.0) | - | - | 6(20.0)  |
|                     |     | 1 | 30 | 28(93.3) | - | - | 2(6.7)   |
|                     |     | 2 | 31 | 19(61.3) | - | - | 12(38.7) |
|                     |     | 3 | 30 | 28(93.3) | - | - | 2(6.7)   |
|                     |     | 4 | 30 | 28(93.3) | - | - | 2(6.7)   |
|                     | PR3 | 5 | 30 | 29(96.7) | - | - | 1(3.3)   |
|                     |     | 1 | 30 | 26(86.7) | - | - | 4(13.3)  |
|                     |     | 2 | 30 | 29(96.7) | - | - | 1(3.3)   |
|                     |     | 3 | 32 | 31(96.9) | - | - | 1(3.1)   |
|                     |     | 4 | 32 | 31(96.9) | - | - | 1(3.1)   |
|                     | PR4 | 5 | 31 | 31(100)  | - | - | -        |
|                     |     | 1 | 34 | 33(97.1) | - | - | 1(2.9)   |
|                     |     | 2 | 37 | 35(94.6) | - | - | 2(5.4)   |
|                     |     | 3 | 34 | 32(94.1) | - | - | 2(5.9)   |
|                     |     | 4 | 33 | 30(90.9) | - | - | 3(9.1)   |
| <i>P. urvillei</i>  | PR5 | 5 | 32 | 32(100)  | - | - | -        |
|                     |     | 1 | 37 | 36(97.3) | - | - | 1(2.7)   |
|                     |     | 2 | 30 | 30(100)  | - | - | -        |
|                     |     | 3 | 34 | 30(88.2) | - | - | 4(11.8)  |
|                     |     | 4 | 33 | 30(90.9) | - | - | 3(9.1)   |
|                     | PU1 | 5 | 30 | 27(90.0) | - | - | 3(10.0)  |
|                     |     | 1 | 34 | 32(94.1) | - | - | 2(5.9)   |
|                     |     | 2 | 40 | 39(97.5) | - | - | 1(2.5)   |
|                     |     | 3 | 30 | 29(96.7) | - | - | 1(3.3)   |
|                     |     | 4 | 33 | 33(100)  | - | - | -        |
|                     | PU2 | 5 | 30 | 27(90.0) | - | - | 3(10.0)  |
|                     |     | 1 | 32 | 29(90.6) | - | - | 3(9.4)   |
|                     |     | 2 | 35 | 35(100)  | - | - | -        |
|                     |     | 3 | 30 | 30(100)  | - | - | -        |
|                     |     | 4 | 30 | 29(96.7) | - | - | 1(3.3)   |
|                     | PU3 | 5 | 31 | 30(96.8) | - | - | 1(3.2)   |
|                     |     | 1 | 30 | 30(100)  | - | - | -        |
|                     |     | 2 | 30 | 30(100)  | - | - | -        |
|                     |     | 3 | 30 | 30(100)  | - | - | -        |
|                     |     | 4 | 33 | 32(97.0) | - | - | 1(3.0)   |
|                     | PU4 | 5 | 33 | 33(100)  | - | - | -        |
|                     |     | 1 | 31 | 30(96.8) | - | - | 1(3.2)   |
|                     |     | 2 | 33 | 33(100)  | - | - | -        |
|                     |     | 3 | 30 | 30(100)  | - | - | -        |

|     |   |    |          |   |   |        |
|-----|---|----|----------|---|---|--------|
|     | 4 | 32 | 30(93.8) | - | - | 2(6.2) |
|     | 5 | 30 | 28(93.3) | - | - | 2(6.7) |
| PU5 | 1 | 30 | 30(100)  | - | - | -      |
|     | 2 | 30 | 30(100)  | - | - | -      |
|     | 3 | 35 | 30(100)  | - | - | -      |
|     | 4 | 30 | 30(100)  | - | - | -      |
|     | 5 | 30 | 30(100)  | - | - | -      |

MES: meiotic embryo sac, AES: aposporous embryo sac; MES+AES: ovules bearing meiotic and aposporous embryo sacs, AbES: absent or undeveloped embryo sac.

**Table S2.** Number of pollinated spikelets and seed set for two pollination conditions (self- and open-pollination) during two flowering periods (1st, 2015-2016 and 2nd, 2016-2017) in populations of four *Paspalum* species.

| Species              | Population | Pollination method | Period          | Pollinated Spikelets (no.) | Seed set (%) |       |       |        |
|----------------------|------------|--------------------|-----------------|----------------------------|--------------|-------|-------|--------|
|                      |            |                    |                 |                            | Mean         | Min.  | Max.  | CV     |
| <i>P. durifolium</i> | PD1        | Self-pollination   | 1 <sup>st</sup> | 13,870                     | 0.27         | 0.00  | 0.49  | 74.63  |
|                      |            |                    | 2 <sup>nd</sup> | 12,447                     | 0.61         | 0.00  | 1.46  | 102.00 |
|                      |            | Open-pollination   | 1 <sup>st</sup> | 18,155                     | 28.09        | 13.84 | 38.50 | 34.11  |
|                      |            |                    | 2 <sup>nd</sup> | 19,620                     | 29.58        | 10.10 | 44.10 | 43.04  |
|                      | PD2        | Self-pollination   | 1 <sup>st</sup> | 12,510                     | 0.35         | 0.00  | 1.15  | 147.77 |
|                      |            |                    | 2 <sup>nd</sup> | 17,633                     | 0.65         | 0.20  | 1.10  | 62.46  |
|                      |            | Open-pollination   | 1 <sup>st</sup> | 17,537                     | 46.30        | 39.80 | 60.30 | 17.88  |
|                      |            |                    | 2 <sup>nd</sup> | 23,034                     | 51.54        | 43.30 | 60.00 | 14.66  |
|                      | PD3        | Self-pollination   | 1 <sup>st</sup> | 20,534                     | 0.16         | 0.00  | 0.58  | 145.17 |
|                      |            |                    | 2 <sup>nd</sup> | 17,967                     | 0.65         | 0.04  | 2.10  | 133.32 |
|                      |            | Open-pollination   | 1 <sup>st</sup> | 18,470                     | 57.90        | 45.87 | 75.91 | 20.12  |
|                      |            |                    | 2 <sup>nd</sup> | 24,338                     | 45.16        | 19.00 | 69.40 | 42.75  |
|                      | PD4        | Self-pollination   | 1 <sup>st</sup> | 9,538                      | 1.24         | 0.05  | 4.45  | 148.39 |
|                      |            |                    | 2 <sup>nd</sup> | 10,729                     | 0.47         | 0.00  | 1.50  | 128.02 |
|                      |            | Open-pollination   | 1 <sup>st</sup> | 13,059                     | 45.52        | 6.14  | 95.37 | 83.83  |
|                      |            |                    | 2 <sup>nd</sup> | 14,763                     | 42.70        | 30.00 | 64.00 | 34.75  |
|                      | PD5        | Self-pollination   | 1 <sup>st</sup> | 10,632                     | 0.17         | 0.00  | 0.48  | 129.51 |
|                      |            |                    | 2 <sup>nd</sup> | 20,406                     | 1.18         | 0.06  | 3.20  | 107.46 |
|                      |            | Open-pollination   | 1 <sup>st</sup> | 20,748                     | 33.17        | 17.6  | 51.22 | 42.53  |
|                      |            |                    | 2 <sup>nd</sup> | 23,408                     | 27.97        | 18.13 | 42.60 | 32.28  |
| <i>P. ionanthum</i>  | PI1        | Self-pollination   | 1 <sup>st</sup> | 896,00                     | 1.00         | 0.00  | 3.60  | 152.88 |
|                      |            |                    | 2 <sup>nd</sup> | 600,00                     | 1.00         | 0.00  | 3.60  | 152.26 |
|                      |            | Open-pollination   | 1 <sup>st</sup> | 1,402                      | 35.60        | 20.00 | 49.60 | 31.79  |
|                      |            |                    | 2 <sup>nd</sup> | 1,974                      | 23.20        | 3.50  | 39.20 | 61.74  |
|                      | PI2        | Self-pollination   | 1 <sup>st</sup> | 1,146                      | 0.26         | 0.00  | 1.33  | 223.61 |

|                     |     |                  |                 |        |       |       |       |        |
|---------------------|-----|------------------|-----------------|--------|-------|-------|-------|--------|
| <i>P. regnellii</i> | PI3 | Open-pollination | 2 <sup>nd</sup> | 2,289  | 1.22  | 0.00  | 3.58  | 139.84 |
|                     |     |                  | 1 <sup>st</sup> | 2,186  | 60.25 | 44.92 | 80.71 | 22.59  |
|                     |     | Self-pollination | 2 <sup>nd</sup> | 4,288  | 31.27 | 15.33 | 51.27 | 44.79  |
|                     |     |                  | 1 <sup>st</sup> | 1,315  | 4.26  | 0.00  | 21.27 | 223.61 |
|                     |     | Open-pollination | 2 <sup>nd</sup> | 1,324  | 1.36  | 0.00  | 3.55  | 118.00 |
|                     |     |                  | 1 <sup>st</sup> | 2,533  | 49.66 | 42.00 | 58.36 | 13.06  |
|                     | PI4 | Open-pollination | 2 <sup>nd</sup> | 1,143  | 58.88 | 29.22 | 75.47 | 29.89  |
|                     |     |                  | 1 <sup>st</sup> | 1,214  | 0.16  | 0.00  | 0.58  | 223.61 |
|                     |     | Self-pollination | 2 <sup>nd</sup> | 2,549  | 1.10  | 0.00  | 2.91  | 109.53 |
|                     |     |                  | 1 <sup>st</sup> | 1,608  | 52.80 | 19.76 | 68.46 | 38.24  |
|                     | PI5 | Open-pollination | 2 <sup>nd</sup> | 2,970  | 39.22 | 30.63 | 46.70 | 15.39  |
|                     |     |                  | 1 <sup>st</sup> | 1,261  | 2.85  | 0.00  | 9.02  | 123.99 |
|                     |     | Self-pollination | 2 <sup>nd</sup> | 1,969  | 0.71  | 0.00  | 2.21  | 122.51 |
|                     |     |                  | 1 <sup>st</sup> | 1,711  | 45.53 | 11.29 | 64.40 | 47.33  |
|                     | PR1 | Open-pollination | 2 <sup>nd</sup> | 2,444  | 27.82 | 15.58 | 41.88 | 42.23  |
|                     |     |                  | 1 <sup>st</sup> | 15,139 | 8.51  | 0.96  | 15.35 | 73.56  |
|                     |     | Self-pollination | 2 <sup>nd</sup> | 18,527 | 4.96  | 0.33  | 18.13 | 151.33 |
|                     |     |                  | 1 <sup>st</sup> | 14,894 | 23.47 | 9.22  | 49.76 | 72.02  |
|                     | PR2 | Open-pollination | 2 <sup>nd</sup> | 18,481 | 34.19 | 16.61 | 58.51 | 52.63  |
|                     |     |                  | 1 <sup>st</sup> | 13,811 | 25.93 | 12.00 | 46.31 | 54.58  |
|                     |     | Self-pollination | 2 <sup>nd</sup> | 17,928 | 6.19  | 2.62  | 12.95 | 69.72  |
|                     |     |                  | 1 <sup>st</sup> | 16,890 | 38.14 | 17.68 | 62.96 | 43.30  |
|                     | PR3 | Open-pollination | 2 <sup>nd</sup> | 15,929 | 44.17 | 18.33 | 68.70 | 41.93  |
|                     |     |                  | 1 <sup>st</sup> | 12,753 | 12.44 | 0.45  | 31.24 | 101.83 |
|                     |     | Self-pollination | 2 <sup>nd</sup> | 11,263 | 9.74  | 3.62  | 24.75 | 89.48  |
|                     |     |                  | 1 <sup>st</sup> | 20,919 | 24.06 | 12.40 | 41.37 | 52.51  |
|                     | PR4 | Open-pollination | 2 <sup>nd</sup> | 18,050 | 28.70 | 9.73  | 62.12 | 72.44  |
|                     |     |                  | 1 <sup>st</sup> | 12,584 | 10.48 | 1.17  | 29.58 | 110.58 |
|                     |     | Self-pollination | 2 <sup>nd</sup> | 15,553 | 2.34  | 0.16  | 4.83  | 82.49  |
|                     |     |                  | 1 <sup>st</sup> | 15,157 | 35.83 | 11.01 | 54.41 | 44.93  |
|                     | PR5 | Open-pollination | 2 <sup>nd</sup> | 18,991 | 20.77 | 1.52  | 35.48 | 63.21  |
|                     |     |                  | 1 <sup>st</sup> | 12,280 | 25.16 | 11.58 | 37.30 | 41.70  |
|                     |     | Self-pollination | 2 <sup>nd</sup> | 12,978 | 12.47 | 0.13  | 18.34 | 56.92  |
|                     |     |                  | 1 <sup>st</sup> | 15,833 | 62.20 | 44.41 | 85.16 | 25.00  |
| <i>P. urvillei</i>  | PU1 | Open-pollination | 2 <sup>nd</sup> | 15,765 | 37.35 | 0.36  | 63.31 | 69.19  |
|                     |     |                  | 1 <sup>st</sup> | 9,993  | 44.61 | 20.56 | 84.17 | 56.86  |
|                     |     | Self-pollination | 2 <sup>nd</sup> | 14,976 | 40.75 | 12.06 | 59.80 | 43.60  |
|                     |     |                  | 1 <sup>st</sup> | 20,346 | 80.15 | 72.64 | 88.53 | 8.12   |
|                     | PU2 | Open-pollination | 2 <sup>nd</sup> | 29,845 | 59.76 | 31.86 | 83.20 | 30.82  |
|                     |     |                  | 1 <sup>st</sup> | 9,029  | 30.76 | 1.47  | 58.60 | 67.84  |
|                     |     | Self-pollination | 2 <sup>nd</sup> | 14,994 | 52.99 | 36.37 | 63.98 | 22.00  |
|                     |     |                  | 1 <sup>st</sup> | 14,871 | 86.87 | 72.22 | 92.83 | 9.78   |
|                     | PU3 | Open-pollination | 2 <sup>nd</sup> | 31,962 | 74.41 | 44.00 | 93.80 | 29.39  |
|                     |     |                  | 1 <sup>st</sup> | 9,233  | 38.47 | 11.10 | 71.88 | 68.40  |
|                     |     | Self-pollination | 2 <sup>nd</sup> | 13,788 | 32.75 | 20.90 | 50.48 | 37.07  |
|                     |     |                  | 1 <sup>st</sup> | 8,841  | 92.01 | 84.77 | 96.48 | 5.53   |
|                     | PU4 | Open-pollination | 2 <sup>nd</sup> | 21,562 | 64.01 | 51.47 | 89.25 | 25.76  |
|                     |     |                  | 1 <sup>st</sup> | 10,436 | 33.34 | 6.88  | 75.80 | 75.79  |
|                     | PU4 | Self-pollination | 2 <sup>nd</sup> | 14,567 | 52.22 | 41.10 | 68.40 | 20.77  |

|     |                  |                 |        |       |       |       |       |
|-----|------------------|-----------------|--------|-------|-------|-------|-------|
| PU5 | Open-pollination | 1 <sup>st</sup> | 13,736 | 76.71 | 55.83 | 95.19 | 21.07 |
|     |                  | 2 <sup>nd</sup> | 29,181 | 69.56 | 64.85 | 75.09 | 6.02  |
|     | Self-pollination | 1 <sup>st</sup> | 10,020 | 31.80 | 21.70 | 40.20 | 24.74 |
|     |                  | 2 <sup>nd</sup> | 11,706 | 54.44 | 26.05 | 71.70 | 39.28 |
|     | Open-pollination | 1 <sup>st</sup> | 11,910 | 74.00 | 56.90 | 91.70 | 18.34 |
|     |                  | 2 <sup>nd</sup> | 23,105 | 66.05 | 52.00 | 85.70 | 21.41 |

---
